# Supplementary material for: Polyclonal Aptamers for Specific Fluorescence Labeling and Quantification of the Health Relevant Human Gut Bacterium Parabacteroides distasonis
Source: MDPI journal article supplement (doi:10.3390/microorganisms9112284), 2021-11-02
Supplement: s1 [file s1]

## Supplementary Materials

**Table S1.** The selection condition. The amount of aptamer library, counter SELEX, target SELEX, incubation temperature and incubation time, washing condition, and the amount of BSA/tRNA were indicated here.

| SELEX rounds | Aptamer (pmol) | Counter SELEX (Incubation temperature and time)                     | Target SELEX (Incubation temperature and time)     | Wash times | BSA/tRNA (pmol) |
|--------------|----------------|---------------------------------------------------------------------|----------------------------------------------------|------------|-----------------|
| 1            | 500            | -                                                                   | 250 $\mu$ L OD600=1<br>Incubation: 37 °C for 1 h   | 1          | 600             |
| 2            | 10             | -                                                                   | 250 $\mu$ L OD600=1<br>Incubation: 37 °C for 1 h   | 1          | 900             |
| 3            | 10             | -                                                                   | 250 $\mu$ L OD600=1<br>Incubation: 37 °C for 1 h   | 2          | 1200            |
| 4            | 10             | -                                                                   | 250 $\mu$ L OD600=1<br>Incubation: 37 °C for 1 h   | 2          | 1500            |
| 5            | 10             | -                                                                   | 250 $\mu$ L OD600=1<br>Incubation: 37 °C for 1 h   | 3          | 1800            |
| 6            | 10             | 250 $\mu$ L OD600=2 <i>R. microfus</i><br>Incubation: 37 °C for 1 h | 250 $\mu$ L OD600=1<br>Incubation: 37 °C for 1 h   | 4          | 2100            |
| 7            | 10             | 50 $\mu$ L OD600=2 per bacterium<br>Incubation: 37 °C for 1 h       | 250 $\mu$ L OD600=1<br>Incubation: 37 °C for 1 h   | 6          | 2400            |
| 8            | 10             | 50 $\mu$ L OD600=2 per bacterium<br>Incubation: 37 °C for 1 h       | 250 $\mu$ L OD600=1<br>Incubation: 37 °C for 1 h   | 6          | 2700            |
| 9            | 10             | 50 $\mu$ L OD600=2 per bacterium<br>Incubation: 37 °C for 1 h       | 250 $\mu$ L OD600=1<br>Incubation: 37 °C for 1 h   | 6          | 3300            |
| 10           | 10             | 50 $\mu$ L OD600=2 per bacterium<br>Incubation: 37 °C for 1 h       | 250 $\mu$ L OD600=1<br>Incubation: 37 °C for 1 h   | 6          | 3600            |
| 11           | 10             | 50 $\mu$ L OD600=2 per bacterium<br>Incubation: 37 °C for 1 h       | 250 $\mu$ L OD600=1<br>Incubation: 37 °C for 1 h   | 6          | 3900            |
| 12           | 5              | 50 $\mu$ L OD600=2 per bacterium<br>Incubation: 37 °C for 1 h       | 250 $\mu$ L OD600=1<br>Incubation: 37 °C for 1 h   | 6          | 4200            |
| 13           | 5              | 50 $\mu$ L OD600=2 per bacterium<br>Incubation: 37 °C for 1 h       | 250 $\mu$ L OD600=1<br>Incubation: 37 °C for 0.5 h | 6          | 4500            |
| 14           | 0.5            | 500 $\mu$ L OD600=2 per bacterium<br>Incubation: 37 °C for 1 h      | 250 $\mu$ L OD600=1<br>Incubation: 37 °C for 0.5 h | 6          | 4500            |

Note: 1. To avoid non-specific interaction between the aptamer and the cell surface, the BSA (100 mg/mL) and tRNA (10 mg/mL) as competitors were incubated with targeted cells. 2. Counter-selection: Aptamer library was incubated with *A. muciniphila*, *A. stercoricanis*, *R. intestinalis*, *B. producta*, and *R. microfus*. 3. Target SELEX: Aptamer library was incubated with *P. distasonis*.
